# Supplementary material
Source: PubMed Central journal article supplement (PMC6716374)

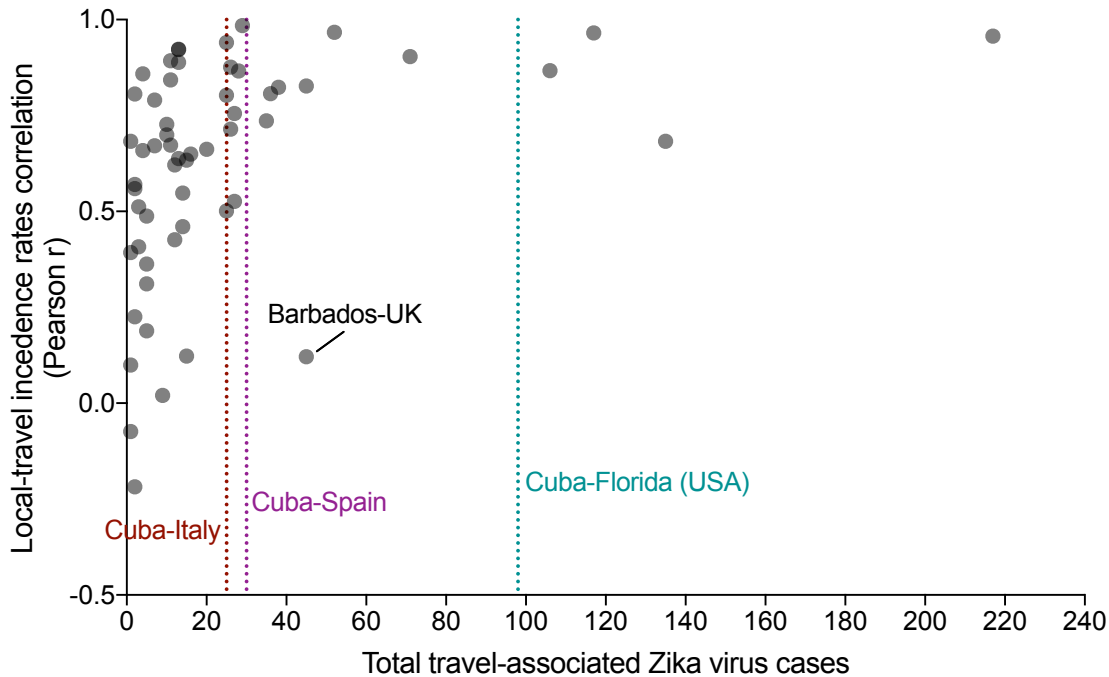

Supplement: NIHMS1534972-supplement-2.pdf [file NIHMS1534972-supplement-2.pdf]

## Travel from Cuba to Florida

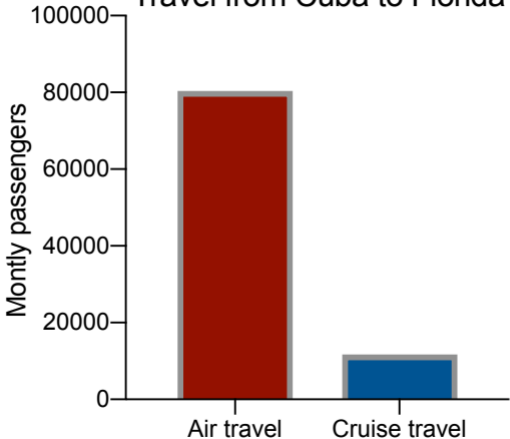

Supplement: NIHMS1534972-supplement-3.pdf [file NIHMS1534972-supplement-3.pdf]

# Posterior predictions of total travel incidence

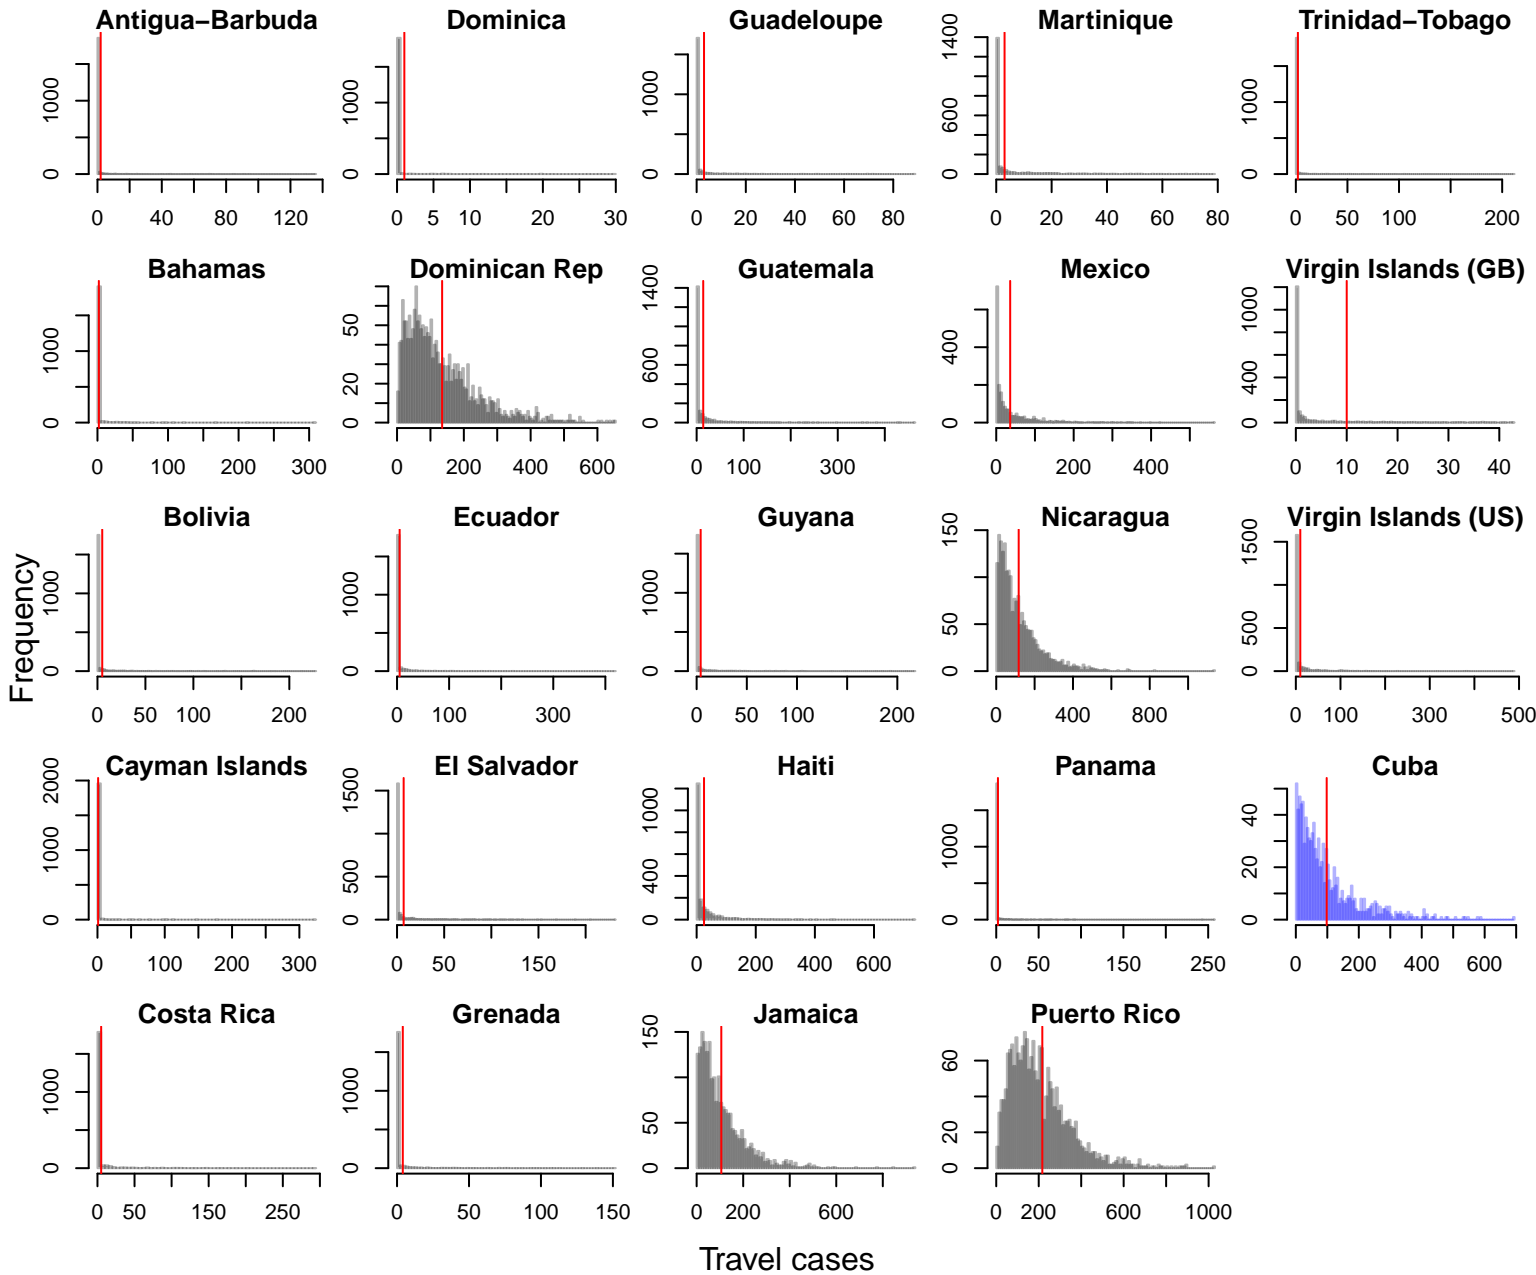

Supplement: NIHMS1534972-supplement-4.pdf [file NIHMS1534972-supplement-4.pdf]

# Posterior predictions of total local incidence

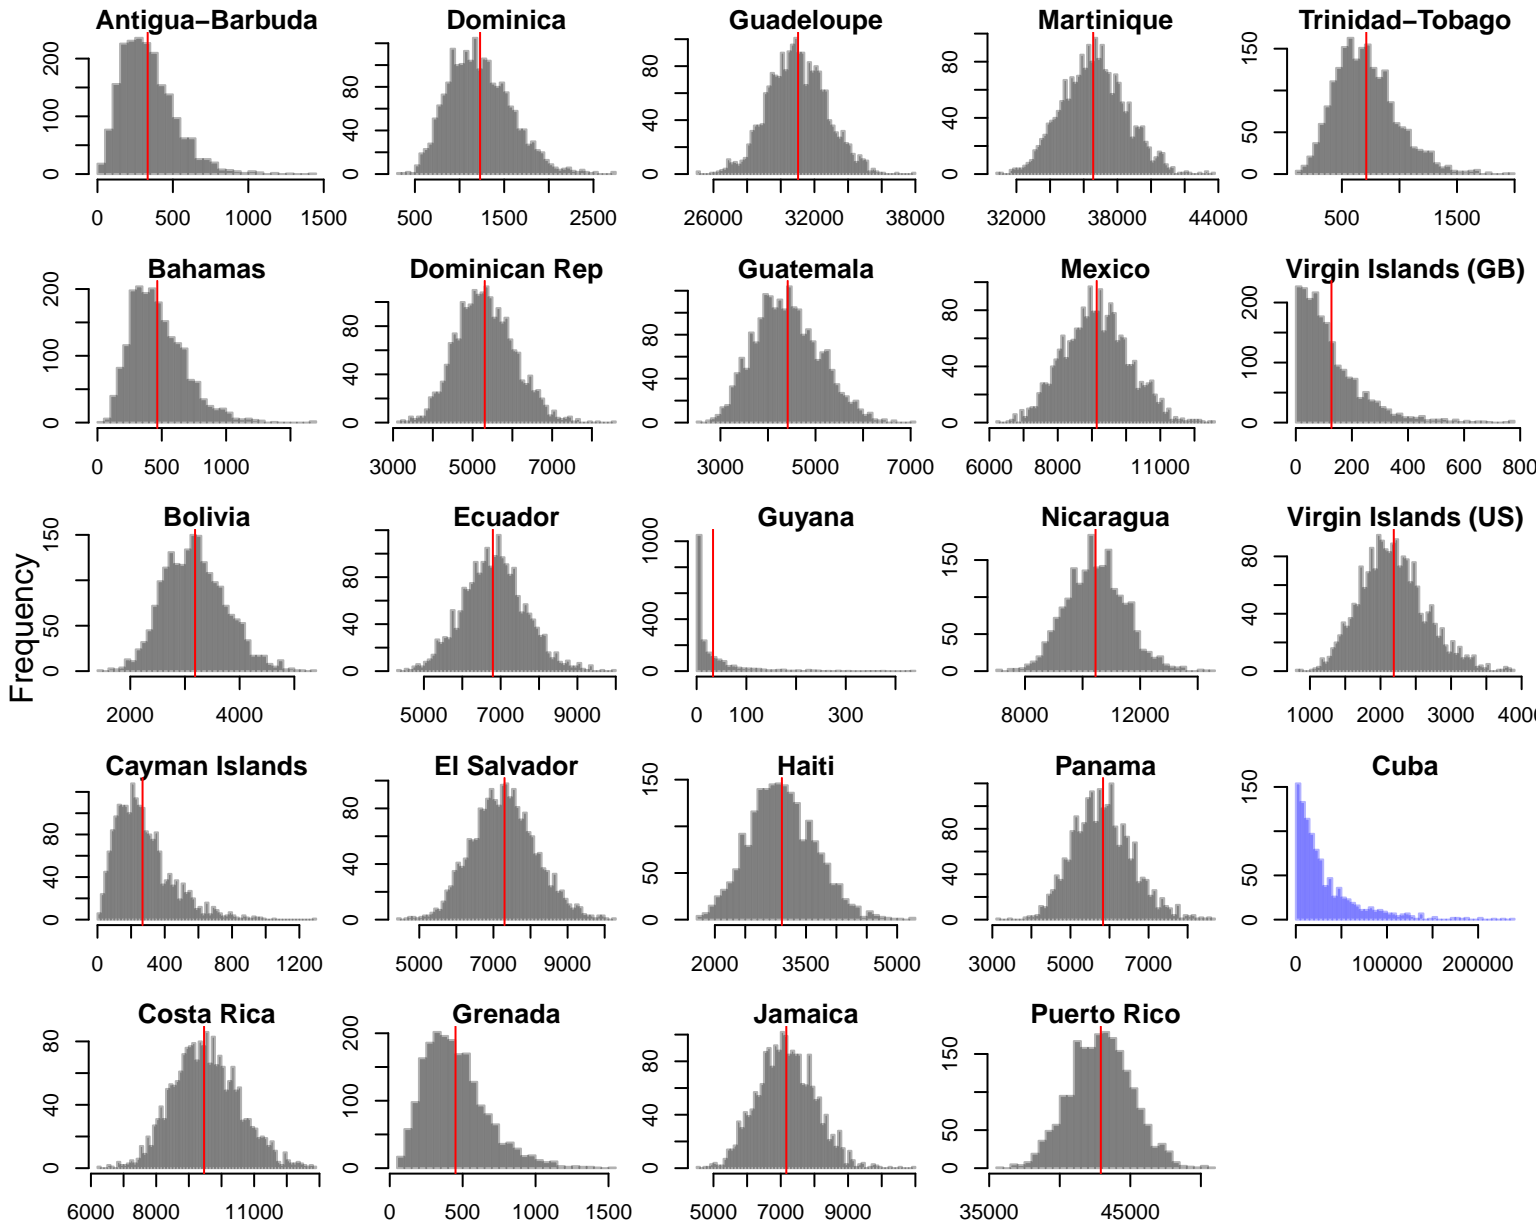

Local cases

Supplement: NIHMS1534972-supplement-5.pdf [file NIHMS1534972-supplement-5.pdf]

A

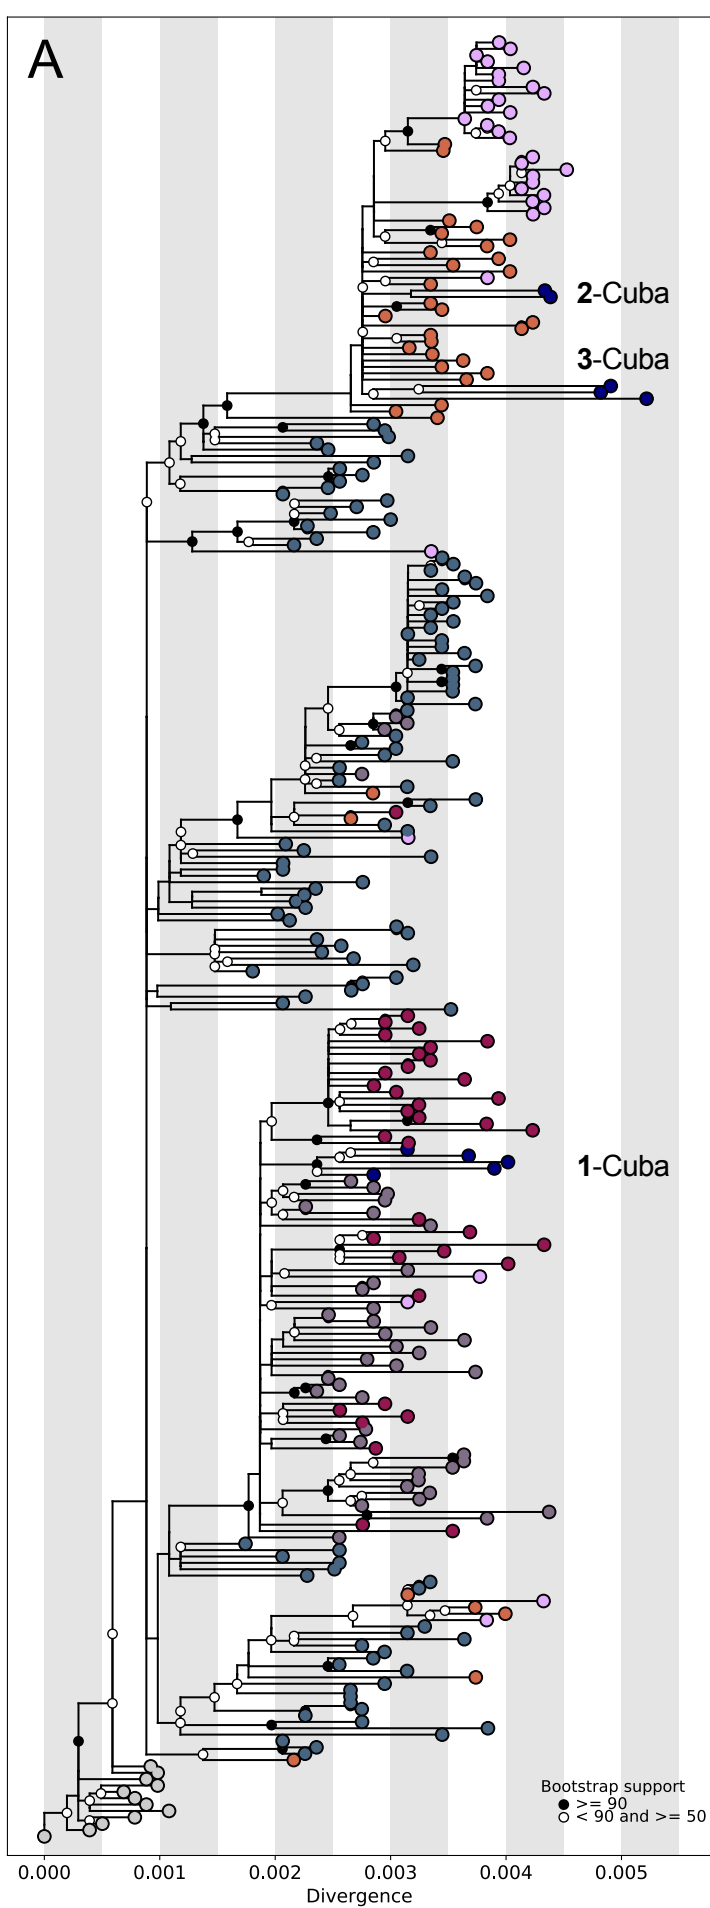

B

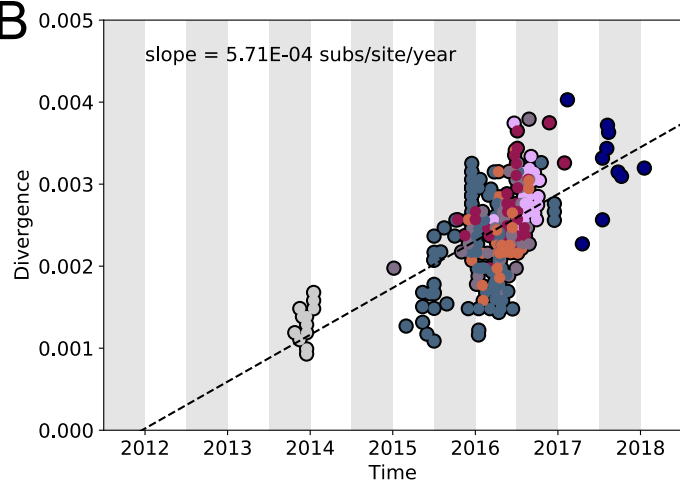

Supplement: NIHMS1534972-supplement-6.pdf [file NIHMS1534972-supplement-6.pdf]
